# Supplementary material
Source: publisher figshare collection journal article supplement (https://acs.figshare.com/ndownloader/files/5056447)
Supplement: Supplementary file 1 [file 5056447]

  
data_030224b 
  
_audit_creation_method            SHELXL-97 
_chemical_name_systematic 
; 
 ? 
; 
_chemical_name_common             ? 
_chemical_melting_point           ? 
_chemical_formula_moiety          ? 
_chemical_formula_sum 
 'C18 H42 N4 O24 V3' 
_chemical_formula_weight          851.38 
  
loop_ 
 _atom_type_symbol 
 _atom_type_description 
 _atom_type_scat_dispersion_real 
 _atom_type_scat_dispersion_imag 
 _atom_type_scat_source 
 'C'  'C'   0.0033   0.0016 
 'International Tables Vol C Tables 4.2.6.8 and 6.1.1.4' 
 'H'  'H'   0.0000   0.0000 
 'International Tables Vol C Tables 4.2.6.8 and 6.1.1.4' 
 'N'  'N'   0.0061   0.0033 
 'International Tables Vol C Tables 4.2.6.8 and 6.1.1.4' 
 'O'  'O'   0.0106   0.0060 
 'International Tables Vol C Tables 4.2.6.8 and 6.1.1.4' 
 'V'  'V'   0.3005   0.5294 
 'International Tables Vol C Tables 4.2.6.8 and 6.1.1.4' 
  
_symmetry_cell_setting            Monoclinic 
_symmetry_space_group_name_H-M    P2(1)/n 
  
loop_ 
 _symmetry_equiv_pos_as_xyz 
 'x, y, z' 
 '-x+1/2, y+1/2, -z+1/2' 
 '-x, -y, -z' 
 'x-1/2, -y-1/2, z-1/2' 
  
_cell_length_a                    6.879(2) 
_cell_length_b                    21.636(7) 
_cell_length_c                    11.043(3) 
_cell_angle_alpha                 90.00 
_cell_angle_beta                  95.128(5) 
_cell_angle_gamma                 90.00 
_cell_volume                      1637.0(9) 
_cell_formula_units_Z             2 
_cell_measurement_temperature     293(2) 
_cell_measurement_reflns_used     927 
_cell_measurement_theta_min       3.36 
_cell_measurement_theta_max       25.33 
  
_exptl_crystal_description        ? 
_exptl_crystal_colour             ? 
_exptl_crystal_size_max           0.32 
_exptl_crystal_size_mid           0.24 
_exptl_crystal_size_min           0.20 
_exptl_crystal_density_meas       NONE 
_exptl_crystal_density_diffrn     1.727 
_exptl_crystal_density_method     'not measured' 
_exptl_crystal_F_000              878 
_exptl_absorpt_coefficient_mu     0.940 
_exptl_absorpt_correction_type    MULTI-SCAN 
_exptl_absorpt_correction_T_min   0.848906 
_exptl_absorpt_correction_T_max   1.000000 
_exptl_absorpt_process_details    SADABS 
  
_exptl_special_details 
; 
 ? 
; 
  
_diffrn_ambient_temperature       293(2) 
_diffrn_radiation_wavelength      0.71073 
_diffrn_radiation_type            MoK\a 
_diffrn_radiation_source          'fine-focus sealed tube' 
_diffrn_radiation_monochromator   graphite 
_diffrn_measurement_device_type   'CCD area detector' 
_diffrn_measurement_method        'phi and omega scans' 
_diffrn_detector_area_resol_mean  ? 
_diffrn_standards_number          ? 
_diffrn_standards_interval_count  ? 
_diffrn_standards_interval_time   ? 
_diffrn_standards_decay_%         ? 
_diffrn_reflns_number             9244 
_diffrn_reflns_av_R_equivalents   0.0434 
_diffrn_reflns_av_sigmaI/netI     0.0534 
_diffrn_reflns_limit_h_min        -8 
_diffrn_reflns_limit_h_max        8 
_diffrn_reflns_limit_k_min        -26 
_diffrn_reflns_limit_k_max        27 
_diffrn_reflns_limit_l_min        -8 
_diffrn_reflns_limit_l_max        13 
_diffrn_reflns_theta_min          1.88 
_diffrn_reflns_theta_max          26.40 
_reflns_number_total              3333 
_reflns_number_gt                 2456 
_reflns_threshold_expression      >2sigma(I) 
  
_computing_data_collection        'Bruker SMART' 
_computing_cell_refinement        'Bruker SMART' 
_computing_data_reduction         'Bruker SAINT' 
_computing_structure_solution     'SHELXS-97 (Sheldrick, 1990)' 
_computing_structure_refinement   'SHELXL-97 (Sheldrick, 1997)' 
_computing_molecular_graphics     'Bruker SHELXTL' 
_computing_publication_material   'Bruker SHELXTL' 
  
_refine_special_details 
; 
 Refinement of F^2^ against ALL reflections.  The weighted R-factor wR and 
 goodness of fit S are based on F^2^, conventional R-factors R are based 
 on F, with F set to zero for negative F^2^. The threshold expression of 
 F^2^ > 2sigma(F^2^) is used only for calculating R-factors(gt) etc. and is 
 not relevant to the choice of reflections for refinement.  R-factors based 
 on F^2^ are statistically about twice as large as those based on F, and R- 
 factors based on ALL data will be even larger. 
; 
  
_refine_ls_structure_factor_coef  Fsqd 
_refine_ls_matrix_type            full 
_refine_ls_weighting_scheme       calc 
_refine_ls_weighting_details 
 'calc w=1/[\s^2^(Fo^2^)+(0.0219P)^2^+2.0535P] where P=(Fo^2^+2Fc^2^)/3' 
_atom_sites_solution_primary      direct 
_atom_sites_solution_secondary    difmap 
_atom_sites_solution_hydrogens    geom 
_refine_ls_hydrogen_treatment     mixed 
_refine_ls_extinction_method      none 
_refine_ls_extinction_coef        ? 
_refine_ls_number_reflns          3333 
_refine_ls_number_parameters      251 
_refine_ls_number_restraints      13 
_refine_ls_R_factor_all           0.0764 
_refine_ls_R_factor_gt            0.0474 
_refine_ls_wR_factor_ref          0.0945 
_refine_ls_wR_factor_gt           0.0862 
_refine_ls_goodness_of_fit_ref    1.077 
_refine_ls_restrained_S_all       1.075 
_refine_ls_shift/su_max           0.000 
_refine_ls_shift/su_mean          0.000 
  
loop_ 
 _atom_site_label 
 _atom_site_type_symbol 
 _atom_site_fract_x 
 _atom_site_fract_y 
 _atom_site_fract_z 
 _atom_site_U_iso_or_equiv 
 _atom_site_adp_type 
 _atom_site_occupancy 
 _atom_site_symmetry_multiplicity 
 _atom_site_calc_flag 
 _atom_site_refinement_flags 
 _atom_site_disorder_assembly 
 _atom_site_disorder_group 
V1 V 0.33730(8) 0.12061(2) 0.39373(5) 0.02270(14) Uani 1 1 d . . . 
O1 O 0.4337(3) 0.10859(10) 0.5679(2) 0.0328(6) Uani 1 1 d . . . 
O2 O 0.4568(5) 0.14051(12) 0.7597(2) 0.0603(9) Uani 1 1 d . . . 
O3 O 0.5101(3) 0.19289(11) 0.3686(2) 0.0344(6) Uani 1 1 d . . . 
O4 O 0.5258(4) 0.29419(12) 0.3341(3) 0.0536(8) Uani 1 1 d . . . 
O5 O 0.1701(3) 0.14924(11) 0.2483(2) 0.0322(6) Uani 1 1 d . . . 
O6 O -0.0943(4) 0.13268(12) 0.1252(2) 0.0464(7) Uani 1 1 d . . . 
O7 O 0.4465(3) 0.06180(11) 0.3416(2) 0.0379(6) Uani 1 1 d . . . 
N1 N 0.0607(4) 0.07882(11) 0.4305(2) 0.0233(6) Uani 1 1 d . . . 
N2 N 0.1983(4) 0.20135(11) 0.4865(2) 0.0247(6) Uani 1 1 d . . . 
C1 C 0.0941(4) 0.01577(14) 0.4842(3) 0.0270(7) Uani 1 1 d . . . 
H1A H 0.1826 0.0191 0.5574 0.032 Uiso 1 1 calc R . . 
H1B H 0.1564 -0.0099 0.4270 0.032 Uiso 1 1 calc R . . 
C2 C -0.0374(5) 0.11943(14) 0.5167(3) 0.0302(7) Uani 1 1 d . . . 
H2A H 0.0178 0.1115 0.5991 0.036 Uiso 1 1 calc R . . 
H2B H -0.1754 0.1095 0.5121 0.036 Uiso 1 1 calc R . . 
C3 C -0.0125(5) 0.18708(14) 0.4872(3) 0.0317(8) Uani 1 1 d . . . 
H3A H -0.0795 0.1963 0.4082 0.038 Uiso 1 1 calc R . . 
H3B H -0.0691 0.2124 0.5474 0.038 Uiso 1 1 calc R . . 
C4 C 0.2981(5) 0.20650(16) 0.6108(3) 0.0322(8) Uani 1 1 d . . . 
H4A H 0.2023 0.2162 0.6674 0.039 Uiso 1 1 calc R . . 
H4B H 0.3909 0.2403 0.6129 0.039 Uiso 1 1 calc R . . 
C5 C 0.4035(5) 0.14814(16) 0.6513(3) 0.0338(8) Uani 1 1 d . . . 
C6 C 0.2396(5) 0.25600(15) 0.4133(3) 0.0304(8) Uani 1 1 d . . . 
H6A H 0.2362 0.2931 0.4623 0.037 Uiso 1 1 calc R . . 
H6B H 0.1417 0.2598 0.3448 0.037 Uiso 1 1 calc R . . 
C7 C 0.4403(5) 0.24832(16) 0.3681(3) 0.0331(8) Uani 1 1 d . . . 
C8 C -0.0556(5) 0.07446(16) 0.3095(3) 0.0328(8) Uani 1 1 d . . . 
H8A H -0.1928 0.0802 0.3205 0.039 Uiso 1 1 calc R . . 
H8B H -0.0399 0.0335 0.2761 0.039 Uiso 1 1 calc R . . 
C9 C 0.0062(5) 0.12202(16) 0.2207(3) 0.0305(7) Uani 1 1 d . . . 
V2 V 0.0000 0.5000 0.5000 0.0572(3) Uani 1 2 d S . . 
O8 O 0.0649(4) 0.41338(11) 0.5466(3) 0.0442(7) Uani 1 1 d D . . 
O9 O 0.2677(4) 0.51653(13) 0.4871(3) 0.0520(8) Uani 1 1 d D . . 
O10 O 0.0290(5) 0.52476(12) 0.6751(2) 0.0509(8) Uani 1 1 d D . . 
O11 O 0.8218(4) 0.32370(14) 0.5232(3) 0.0529(8) Uani 1 1 d D . . 
O12 O 0.9591(5) 0.07267(15) 0.8311(3) 0.0685(9) Uani 1 1 d D . . 
H3 H 0.180(3) 0.3985(19) 0.578(4) 0.103 Uiso 1 1 d D . . 
H4 H -0.022(5) 0.3826(14) 0.543(5) 0.103 Uiso 1 1 d D . . 
H7 H 0.022(8) 0.5633(8) 0.704(4) 0.103 Uiso 1 1 d D . . 
H8 H -0.012(8) 0.4987(15) 0.730(3) 0.103 Uiso 1 1 d D . . 
H9 H 0.750(5) 0.327(3) 0.587(2) 0.103 Uiso 1 1 d D . . 
H10 H 0.739(5) 0.325(3) 0.456(2) 0.103 Uiso 1 1 d D . . 
H11 H 0.833(3) 0.079(2) 0.805(5) 0.103 Uiso 1 1 d D . . 
H12 H 1.007(6) 0.1101(11) 0.854(5) 0.103 Uiso 1 1 d D . . 
H5 H 0.364(7) 0.535(3) 0.535(5) 0.15(3) Uiso 1 1 d D . . 
  
loop_ 
 _atom_site_aniso_label 
 _atom_site_aniso_U_11 
 _atom_site_aniso_U_22 
 _atom_site_aniso_U_33 
 _atom_site_aniso_U_23 
 _atom_site_aniso_U_13 
 _atom_site_aniso_U_12 
V1 0.0209(3) 0.0235(3) 0.0239(3) -0.0028(3) 0.0031(2) -0.0020(2) 
O1 0.0376(14) 0.0300(13) 0.0295(12) -0.0022(11) -0.0042(10) 0.0027(11) 
O2 0.110(3) 0.0372(16) 0.0289(14) 0.0006(13) -0.0216(15) 0.0013(16) 
O3 0.0297(13) 0.0329(14) 0.0412(14) -0.0045(12) 0.0067(11) -0.0086(11) 
O4 0.0659(19) 0.0372(15) 0.0622(19) -0.0019(14) 0.0307(16) -0.0229(14) 
O5 0.0342(13) 0.0361(13) 0.0258(12) 0.0048(11) -0.0007(10) -0.0114(11) 
O6 0.0468(15) 0.0472(16) 0.0412(15) 0.0134(13) -0.0188(12) -0.0108(13) 
O7 0.0383(14) 0.0362(14) 0.0410(14) -0.0094(12) 0.0133(11) 0.0024(12) 
N1 0.0242(14) 0.0197(13) 0.0261(14) 0.0024(11) 0.0027(11) -0.0039(11) 
N2 0.0267(14) 0.0199(13) 0.0279(14) 0.0038(12) 0.0042(11) -0.0030(12) 
C1 0.0243(17) 0.0205(16) 0.0360(18) 0.0074(14) 0.0019(14) -0.0016(13) 
C2 0.0256(16) 0.0250(16) 0.042(2) 0.0007(16) 0.0129(15) 0.0009(15) 
C3 0.0279(18) 0.0236(17) 0.045(2) 0.0007(16) 0.0108(16) 0.0012(14) 
C4 0.045(2) 0.0288(18) 0.0227(17) -0.0020(15) 0.0051(15) -0.0024(16) 
C5 0.046(2) 0.0262(18) 0.0277(18) -0.0004(16) -0.0021(16) -0.0098(16) 
C6 0.037(2) 0.0227(17) 0.0314(18) 0.0041(15) 0.0019(15) -0.0035(15) 
C7 0.040(2) 0.034(2) 0.0255(17) -0.0023(16) 0.0048(15) -0.0130(17) 
C8 0.0341(19) 0.0305(19) 0.0323(19) 0.0058(15) -0.0046(15) -0.0114(16) 
C9 0.0312(18) 0.0283(17) 0.0307(18) -0.0006(16) -0.0044(14) -0.0045(16) 
V2 0.1095(10) 0.0279(5) 0.0307(5) -0.0033(4) -0.0125(6) 0.0224(6) 
O8 0.0424(15) 0.0258(13) 0.0610(18) 0.0064(13) -0.0145(14) 0.0011(12) 
O9 0.0337(16) 0.0495(17) 0.073(2) -0.0080(16) 0.0049(15) -0.0081(14) 
O10 0.092(2) 0.0338(15) 0.0274(14) -0.0011(12) 0.0063(14) -0.0136(16) 
O11 0.0562(18) 0.0423(16) 0.0632(19) -0.0135(16) 0.0219(15) -0.0073(15) 
O12 0.079(2) 0.056(2) 0.071(2) 0.0002(18) 0.011(2) -0.0026(18) 
  
_geom_special_details 
; 
 All esds (except the esd in the dihedral angle between two l.s. planes) 
 are estimated using the full covariance matrix.  The cell esds are taken 
 into account individually in the estimation of esds in distances, angles 
 and torsion angles; correlations between esds in cell parameters are only 
 used when they are defined by crystal symmetry.  An approximate (isotropic) 
 treatment of cell esds is used for estimating esds involving l.s. planes. 
; 
  
loop_ 
 _geom_bond_atom_site_label_1 
 _geom_bond_atom_site_label_2 
 _geom_bond_distance 
 _geom_bond_site_symmetry_2 
 _geom_bond_publ_flag 
V1 O7 1.610(2) . ? 
V1 O5 1.989(2) . ? 
V1 O1 1.994(2) . ? 
V1 O3 1.999(2) . ? 
V1 N1 2.177(3) . ? 
V1 N2 2.278(3) . ? 
O1 C5 1.288(4) . ? 
O2 C5 1.232(4) . ? 
O3 C7 1.292(4) . ? 
O4 C7 1.229(4) . ? 
O5 C9 1.285(4) . ? 
O6 C9 1.230(4) . ? 
N1 C1 1.497(4) . ? 
N1 C8 1.498(4) . ? 
N1 C2 1.499(4) . ? 
N2 C6 1.474(4) . ? 
N2 C3 1.483(4) . ? 
N2 C4 1.484(4) . ? 
C1 C1 1.531(6) 3_556 ? 
C1 H1A 0.9700 . ? 
C1 H1B 0.9700 . ? 
C2 C3 1.513(4) . ? 
C2 H2A 0.9700 . ? 
C2 H2B 0.9700 . ? 
C3 H3A 0.9700 . ? 
C3 H3B 0.9700 . ? 
C4 C5 1.504(5) . ? 
C4 H4A 0.9700 . ? 
C4 H4B 0.9700 . ? 
C6 C7 1.519(5) . ? 
C6 H6A 0.9700 . ? 
C6 H6B 0.9700 . ? 
C8 C9 1.508(5) . ? 
C8 H8A 0.9700 . ? 
C8 H8B 0.9700 . ? 
V2 O9 1.894(3) . ? 
V2 O9 1.894(3) 3_566 ? 
V2 O8 1.984(2) . ? 
V2 O8 1.984(2) 3_566 ? 
V2 O10 1.999(3) 3_566 ? 
V2 O10 1.999(3) . ? 
O8 H3 0.896(10) . ? 
O8 H4 0.895(10) . ? 
O9 H5 0.896(10) . ? 
O10 H7 0.895(10) . ? 
O10 H8 0.892(10) . ? 
O11 H9 0.898(10) . ? 
O11 H10 0.897(10) . ? 
O12 H11 0.900(10) . ? 
O12 H12 0.903(10) . ? 
  
loop_ 
 _geom_angle_atom_site_label_1 
 _geom_angle_atom_site_label_2 
 _geom_angle_atom_site_label_3 
 _geom_angle 
 _geom_angle_site_symmetry_1 
 _geom_angle_site_symmetry_3 
 _geom_angle_publ_flag 
O7 V1 O5 102.25(12) . . ? 
O7 V1 O1 96.67(12) . . ? 
O5 V1 O1 159.66(10) . . ? 
O7 V1 O3 105.45(11) . . ? 
O5 V1 O3 87.27(10) . . ? 
O1 V1 O3 94.90(10) . . ? 
O7 V1 N1 100.47(11) . . ? 
O5 V1 N1 80.09(10) . . ? 
O1 V1 N1 89.25(10) . . ? 
O3 V1 N1 153.04(10) . . ? 
O7 V1 N2 174.14(12) . . ? 
O5 V1 N2 83.60(10) . . ? 
O1 V1 N2 77.48(9) . . ? 
O3 V1 N2 75.01(9) . . ? 
N1 V1 N2 79.96(9) . . ? 
C5 O1 V1 122.8(2) . . ? 
C7 O3 V1 120.1(2) . . ? 
C9 O5 V1 118.7(2) . . ? 
C1 N1 C8 110.3(2) . . ? 
C1 N1 C2 110.1(2) . . ? 
C8 N1 C2 111.6(3) . . ? 
C1 N1 V1 110.27(18) . . ? 
C8 N1 V1 105.42(18) . . ? 
C2 N1 V1 108.98(18) . . ? 
C6 N2 C3 114.0(3) . . ? 
C6 N2 C4 110.6(3) . . ? 
C3 N2 C4 112.5(3) . . ? 
C6 N2 V1 105.02(19) . . ? 
C3 N2 V1 107.01(19) . . ? 
C4 N2 V1 107.20(19) . . ? 
N1 C1 C1 113.2(3) . 3_556 ? 
N1 C1 H1A 108.9 . . ? 
C1 C1 H1A 108.9 3_556 . ? 
N1 C1 H1B 108.9 . . ? 
C1 C1 H1B 108.9 3_556 . ? 
H1A C1 H1B 107.8 . . ? 
N1 C2 C3 111.4(3) . . ? 
N1 C2 H2A 109.4 . . ? 
C3 C2 H2A 109.4 . . ? 
N1 C2 H2B 109.4 . . ? 
C3 C2 H2B 109.4 . . ? 
H2A C2 H2B 108.0 . . ? 
N2 C3 C2 109.4(3) . . ? 
N2 C3 H3A 109.8 . . ? 
C2 C3 H3A 109.8 . . ? 
N2 C3 H3B 109.8 . . ? 
C2 C3 H3B 109.8 . . ? 
H3A C3 H3B 108.2 . . ? 
N2 C4 C5 112.5(3) . . ? 
N2 C4 H4A 109.1 . . ? 
C5 C4 H4A 109.1 . . ? 
N2 C4 H4B 109.1 . . ? 
C5 C4 H4B 109.1 . . ? 
H4A C4 H4B 107.8 . . ? 
O2 C5 O1 123.6(3) . . ? 
O2 C5 C4 119.6(3) . . ? 
O1 C5 C4 116.7(3) . . ? 
N2 C6 C7 108.5(3) . . ? 
N2 C6 H6A 110.0 . . ? 
C7 C6 H6A 110.0 . . ? 
N2 C6 H6B 110.0 . . ? 
C7 C6 H6B 110.0 . . ? 
H6A C6 H6B 108.4 . . ? 
O4 C7 O3 124.3(3) . . ? 
O4 C7 C6 119.1(3) . . ? 
O3 C7 C6 116.7(3) . . ? 
N1 C8 C9 112.2(3) . . ? 
N1 C8 H8A 109.2 . . ? 
C9 C8 H8A 109.2 . . ? 
N1 C8 H8B 109.2 . . ? 
C9 C8 H8B 109.2 . . ? 
H8A C8 H8B 107.9 . . ? 
O6 C9 O5 122.1(3) . . ? 
O6 C9 C8 121.1(3) . . ? 
O5 C9 C8 116.8(3) . . ? 
O9 V2 O9 180.00(17) . 3_566 ? 
O9 V2 O8 90.00(12) . . ? 
O9 V2 O8 90.00(12) 3_566 . ? 
O9 V2 O8 90.00(12) . 3_566 ? 
O9 V2 O8 90.00(12) 3_566 3_566 ? 
O8 V2 O8 180.00(17) . 3_566 ? 
O9 V2 O10 89.50(13) . 3_566 ? 
O9 V2 O10 90.50(13) 3_566 3_566 ? 
O8 V2 O10 89.92(12) . 3_566 ? 
O8 V2 O10 90.08(12) 3_566 3_566 ? 
O9 V2 O10 90.50(13) . . ? 
O9 V2 O10 89.50(13) 3_566 . ? 
O8 V2 O10 90.08(12) . . ? 
O8 V2 O10 89.92(12) 3_566 . ? 
O10 V2 O10 180.000(1) 3_566 . ? 
V2 O8 H3 128(3) . . ? 
V2 O8 H4 124(3) . . ? 
H3 O8 H4 108.4(16) . . ? 
V2 O9 H5 135(4) . . ? 
V2 O10 H7 126(3) . . ? 
V2 O10 H8 118(3) . . ? 
H7 O10 H8 108.7(16) . . ? 
H9 O11 H10 107.3(16) . . ? 
H11 O12 H12 106.3(16) . . ? 
  
loop_ 
 _geom_torsion_atom_site_label_1 
 _geom_torsion_atom_site_label_2 
 _geom_torsion_atom_site_label_3 
 _geom_torsion_atom_site_label_4 
 _geom_torsion 
 _geom_torsion_site_symmetry_1 
 _geom_torsion_site_symmetry_2 
 _geom_torsion_site_symmetry_3 
 _geom_torsion_site_symmetry_4 
 _geom_torsion_publ_flag 
O7 V1 O1 C5 172.9(3) . . . . ? 
O5 V1 O1 C5 -28.6(4) . . . . ? 
O3 V1 O1 C5 66.7(3) . . . . ? 
N1 V1 O1 C5 -86.6(3) . . . . ? 
N2 V1 O1 C5 -6.7(3) . . . . ? 
O7 V1 O3 C7 160.1(3) . . . . ? 
O5 V1 O3 C7 58.1(3) . . . . ? 
O1 V1 O3 C7 -101.6(3) . . . . ? 
N1 V1 O3 C7 -3.6(4) . . . . ? 
N2 V1 O3 C7 -26.0(2) . . . . ? 
O7 V1 O5 C9 81.8(3) . . . . ? 
O1 V1 O5 C9 -76.2(4) . . . . ? 
O3 V1 O5 C9 -172.9(2) . . . . ? 
N1 V1 O5 C9 -16.8(2) . . . . ? 
N2 V1 O5 C9 -97.7(2) . . . . ? 
O7 V1 N1 C1 40.5(2) . . . . ? 
O5 V1 N1 C1 141.3(2) . . . . ? 
O1 V1 N1 C1 -56.1(2) . . . . ? 
O3 V1 N1 C1 -155.5(2) . . . . ? 
N2 V1 N1 C1 -133.6(2) . . . . ? 
O7 V1 N1 C8 -78.6(2) . . . . ? 
O5 V1 N1 C8 22.2(2) . . . . ? 
O1 V1 N1 C8 -175.2(2) . . . . ? 
O3 V1 N1 C8 85.4(3) . . . . ? 
N2 V1 N1 C8 107.4(2) . . . . ? 
O7 V1 N1 C2 161.5(2) . . . . ? 
O5 V1 N1 C2 -97.7(2) . . . . ? 
O1 V1 N1 C2 64.9(2) . . . . ? 
O3 V1 N1 C2 -34.5(3) . . . . ? 
N2 V1 N1 C2 -12.6(2) . . . . ? 
O7 V1 N2 C6 128.3(10) . . . . ? 
O5 V1 N2 C6 -55.91(19) . . . . ? 
O1 V1 N2 C6 131.6(2) . . . . ? 
O3 V1 N2 C6 32.97(19) . . . . ? 
N1 V1 N2 C6 -136.9(2) . . . . ? 
O7 V1 N2 C3 -110.2(11) . . . . ? 
O5 V1 N2 C3 65.5(2) . . . . ? 
O1 V1 N2 C3 -107.0(2) . . . . ? 
O3 V1 N2 C3 154.4(2) . . . . ? 
N1 V1 N2 C3 -15.5(2) . . . . ? 
O7 V1 N2 C4 10.6(12) . . . . ? 
O5 V1 N2 C4 -173.6(2) . . . . ? 
O1 V1 N2 C4 13.94(19) . . . . ? 
O3 V1 N2 C4 -84.7(2) . . . . ? 
N1 V1 N2 C4 105.4(2) . . . . ? 
C8 N1 C1 C1 -65.5(4) . . . 3_556 ? 
C2 N1 C1 C1 58.1(4) . . . 3_556 ? 
V1 N1 C1 C1 178.4(3) . . . 3_556 ? 
C1 N1 C2 C3 160.7(3) . . . . ? 
C8 N1 C2 C3 -76.4(3) . . . . ? 
V1 N1 C2 C3 39.6(3) . . . . ? 
C6 N2 C3 C2 156.5(3) . . . . ? 
C4 N2 C3 C2 -76.6(3) . . . . ? 
V1 N2 C3 C2 40.9(3) . . . . ? 
N1 C2 C3 N2 -55.5(4) . . . . ? 
C6 N2 C4 C5 -133.0(3) . . . . ? 
C3 N2 C4 C5 98.3(3) . . . . ? 
V1 N2 C4 C5 -19.1(3) . . . . ? 
V1 O1 C5 O2 177.7(3) . . . . ? 
V1 O1 C5 C4 -2.7(4) . . . . ? 
N2 C4 C5 O2 -164.4(3) . . . . ? 
N2 C4 C5 O1 15.9(4) . . . . ? 
C3 N2 C6 C7 -152.4(3) . . . . ? 
C4 N2 C6 C7 79.7(3) . . . . ? 
V1 N2 C6 C7 -35.6(3) . . . . ? 
V1 O3 C7 O4 -167.6(3) . . . . ? 
V1 O3 C7 C6 12.5(4) . . . . ? 
N2 C6 C7 O4 -160.6(3) . . . . ? 
N2 C6 C7 O3 19.3(4) . . . . ? 
C1 N1 C8 C9 -144.4(3) . . . . ? 
C2 N1 C8 C9 92.8(3) . . . . ? 
V1 N1 C8 C9 -25.3(3) . . . . ? 
V1 O5 C9 O6 -171.9(3) . . . . ? 
V1 O5 C9 C8 6.2(4) . . . . ? 
N1 C8 C9 O6 -167.0(3) . . . . ? 
N1 C8 C9 O5 14.9(4) . . . . ? 
  
_diffrn_measured_fraction_theta_max    0.996 
_diffrn_reflns_theta_full              26.40 
_diffrn_measured_fraction_theta_full   0.996 
_refine_diff_density_max    0.416 
_refine_diff_density_min   -0.916 
_refine_diff_density_rms    0.070 
